# Supplementary material for: Factors of influence on flood risk perceptions related to Hurricane Dorian: an assessment of heuristics, time dynamics, and accuracy of risk perceptions
Source: Copernicus journal article supplement (doi:10.5194/nhess-24-1303-2024), 2024-04-17
Supplement: Supplementary file 1 [file nhess-24-1303-2024-supplement.pdf]

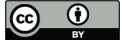

*Supplement of*

**Factors of influence on flood risk perceptions related to Hurricane Dorian: an assessment of heuristics, time dynamics, and accuracy of risk perceptions**

**Laurine A. de Wolf et al.**

*Correspondence to:* Laurine A. de Wolf (l.a.de.wolf@vu.nl)

The copyright of individual parts of the supplement might differ from the article licence.

## Supplementary information

**Table S1.** Coding of the dependent and independent variables

| Variable                                | Coding                                                                                                                                                                                                                                                                                                                |
|-----------------------------------------|-----------------------------------------------------------------------------------------------------------------------------------------------------------------------------------------------------------------------------------------------------------------------------------------------------------------------|
| <i>Dependent variables</i>              |                                                                                                                                                                                                                                                                                                                       |
| Perceived flood probability             | <p><i>“What is your best estimate of how often a flood will occur at your home?”</i></p> <p>7-point Likert scale, 1 = less often than 1/1,000 years to 7 = more often than 1/10 years</p>                                                                                                                             |
| Concern flood probability               | <p><i>“The probability of flooding is so low that I am not concerned about the consequences of a flood”</i></p> <p>5-point Likert scale, 1 = strongly agree to 5 = strongly disagree (higher numbers indicate more concern)</p>                                                                                       |
| Worry about flooding                    | <p><i>“I am worried about the danger of a flood at my current residence”</i></p> <p>5-point Likert scale, 1 = strongly disagree to 5 = strongly agree</p>                                                                                                                                                             |
| Estimated damage                        | <p><i>“What would it cost to repair the damage to your home and its contents if your home did flood”</i></p> <p>Categorical, 1 = \$0-\$10,000; 2 = \$10,000-\$30,000; 3 = \$30,000-\$50,000; 4 = \$50,000-\$70,000; 5 = \$70,000-\$90,000; 6 = \$90,000-\$150,000; 7 = \$150,000-\$350,000; 8 = \$350,000 or more</p> |
| <i>Control variables</i>                |                                                                                                                                                                                                                                                                                                                       |
| Gender                                  | <p><i>Was the respondent male or female?</i></p> <p>Dummy variable, 1 = female, 0 = male</p>                                                                                                                                                                                                                          |
| Age                                     | <p><i>“How old are you?”</i></p> <p>Numeric</p>                                                                                                                                                                                                                                                                       |
| Education                               | <p><i>“What is your highest completed level of education?”</i></p> <p>Categorical, 1 = some high school to 5 = postgraduate</p>                                                                                                                                                                                       |
| Income                                  | <p><i>“Which of the following describes your total household income for 2019 before taxes?”</i></p> <p>Categorical, 1 = less than \$10,000 to 6 = \$125,000 or more</p>                                                                                                                                               |
| Homeowner                               | <p><i>“Do you rent or own your home?”</i></p> <p>Dummy variable, 1 = homeowner, 0 = rent (or missing)</p>                                                                                                                                                                                                             |
| <i>Personal beliefs and experiences</i> |                                                                                                                                                                                                                                                                                                                       |
| Flood experience                        | <p><i>Has the participant in their current household been affected by floods caused by natural disasters?</i></p> <p>Dummy variable, 1=yes, 0=no</p>                                                                                                                                                                  |
| Social norms <sup>a</sup>               | <p><i>“Most people who are important to me would think that someone in my situation ought to take measures to reduce flood risk to one’s home and purchase flood insurance”</i></p> <p>9-point Likert scale</p>                                                                                                       |
| Trust government                        | <p><i>“How much do you trust the ability of government officials to limit flood risk where you live, for example by maintaining levees and enforcing building codes?”</i></p> <p>4-point Likert scale, 1 = not at all, 2 = not much, 3 = somewhat, 4 = completely</p>                                                 |
| <i>Dorian specific</i>                  |                                                                                                                                                                                                                                                                                                                       |
| Awareness living in Dorian impact area  | <p><i>“How certain are you that you live in the area that will be affected by this storm?”</i></p> <p>4-point Likert scale, 1 = certainly not, 2 = no but unsure, 3 = yes but unsure, 4 = certainly yes</p>                                                                                                           |
| Perceived wind speed of Dorian          | <p><i>“The last you heard, what was the category of the hurricane that’s out there now?”</i></p>                                                                                                                                                                                                                      |

Numeric, 1 = Category 1 to 5 = Category 5

*Objective indicators of risk*

Home ground floor

*“Does the part of the building you occupy include the ground floor level?”*

Dummy variable, 1 = yes, 0 = no

Basement

*Home contains basement, cellar or crawlspace*

Dummy variable, 1 = yes, 0 = no

FEMA flood zone

*Does the respondent live in a 1 in 100 year flood zone?*

Dummy variable, 1 = yes, 0 = no

*Time variables*

Time dummies

Categorical, 1\_ = August 29 to 5\_ = September 2

\_1 = 23:00-06:00; \_2 = 06:00-13:00; \_3 = 13:00-17:00; \_4 = 17:00-23:00.

*Personal preferences*

Risk aversion

*“What number reflects how much risk you are willing to take?”*

11-point Likert scale, 0 = not at all willing to take risks, 10 = very willing to take risks

Internal locus of control

*“What number reflects how much control you have over how your life turns out?”*

11-point Likert scale, 0 = no control to 10 = complete control

---

<sup>a</sup> The results of merging two categorical variables

**Table S2.** Ordered logistic regression model of variables of influence on feelings of worry regarding the dangers of flooding.

| <b>Variable</b>              | <b>Worry</b>        | <b>Concern</b>      | <b>Perceived flood probability</b> | <b>Estimated flood damage</b> |
|------------------------------|---------------------|---------------------|------------------------------------|-------------------------------|
| Age                          | -0.016*<br>(0.007)  | -0.012<br>(0.006)   | -0.012<br>(0.008)                  | -0.002<br>(0.007)             |
| Gender                       | 0.174<br>(0.204)    | 0.179<br>(0.196)    | 0.155<br>(0.207)                   | 0.283<br>(0.188)              |
| Education                    |                     |                     |                                    |                               |
| - High school graduate       | 0.905<br>(0.487)    | 1.734<br>(0.910)    | 0.873<br>(0.690)                   | -1.220<br>(0.746)             |
| - Some college               | 0.003<br>(0.470)    | 1.188<br>(0.887)    | 0.395<br>(0.682)                   | -1.838*<br>(0.758)            |
| - College graduate           | 0.446<br>(0.480)    | 1.259<br>(0.890)    | 0.690<br>(0.681)                   | -1.116<br>(0.717)             |
| - Postgraduate               | 0.391<br>(0.513)    | 1.251<br>(0.906)    | 0.695<br>(0.686)                   | -1.201<br>(0.767)             |
| Income                       | -0.071<br>(0.084)   | 0.075<br>(0.076)    | -0.063<br>(0.089)                  | 0.163<br>(0.0923)             |
| Homeowner                    | 0.085<br>(0.352)    | -0.071<br>(0.376)   | -0.870*<br>(0.409)                 | 1.140**<br>(0.393)            |
| Experience flooding          | 0.854***<br>(0.273) | 0.911***<br>(0.271) | 1.683***<br>(0.299)                | 0.222<br>(0.240)              |
| Social norms                 | 0.355***<br>(0.045) | 0.331***<br>(0.048) | 0.297***<br>(0.045)                | -0.071<br>(0.046)             |
| Trust government             | -0.135<br>(0.105)   | -0.213*<br>(0.103)  | -0.109<br>(0.113)                  | 0.033<br>(0.106)              |
| Awareness Dorian impact area | 0.291**<br>(0.108)  | -0.020<br>(0.100)   | -0.077<br>(0.118)                  | 0.153<br>(0.119)              |
| Perceived wind speed Dorian  | 0.034<br>(0.132)    | -0.041<br>(0.132)   | 0.019<br>(0.125)                   | -0.012<br>(0.117)             |
| Home ground floor            | -0.393<br>(0.396)   | -0.661<br>(0.391)   | -0.418<br>(0.458)                  | 0.637<br>(0.388)              |
| Basement                     | 0.721**<br>(0.256)  | 0.288<br>(0.277)    | 0.006<br>(0.275)                   | -0.264<br>(0.234)             |
| FEMA flood zone              | 0.076<br>(0.212)    | -0.126<br>(0.198)   | -0.051<br>(0.215)                  | -0.095<br>(0.203)             |
| Time1_4                      | 0.880<br>(0.737)    | 1.168<br>(0.802)    | 0.297<br>(0.668)                   | 0.920<br>(0.614)              |
| Time2_1                      | 0.919<br>(0.687)    | 1.945*<br>(0.779)   | 0.525<br>(0.799)                   | 0.588<br>(0.528)              |
| Time2_3                      | 1.652<br>(3.492)    | 2.066<br>(1.375)    | -0.713<br>(1.387)                  | 0.889<br>(1.774)              |
| Time2_4                      | 1.318<br>(0.634)    | 1.479*<br>(0.730)   | 0.016<br>(0.619)                   | 0.588<br>(0.528)              |
| Time3_1                      | 1.900*<br>(0.719)   | 1.848*<br>(0.836)   | 0.685<br>(0.732)                   | 0.977<br>(0.656)              |
| Time3_2                      | 0.704<br>(0.852)    | 1.244<br>(0.940)    | 0.042<br>(0.912)                   | 1.114<br>(0.894)              |
| Time3_3                      | 1.937*<br>(0.678)   | 1.442<br>(0.799)    | 0.323<br>(0.690)                   | 1.159<br>(0.595)              |
| Time3_4                      | 1.090<br>(0.635)    | 1.411<br>(0.760)    | 0.171<br>(0.646)                   | 0.432<br>(0.540)              |
| Time4_1                      | 1.325<br>(0.820)    | 0.624<br>(1.041)    | 0.166<br>(0.695)                   | 1.252<br>(0.885)              |

|                           |                   |                   |                  |                   |
|---------------------------|-------------------|-------------------|------------------|-------------------|
| Time4_3                   | 1.449<br>(0.981)  | 1.302<br>(0.986)  | 0.571<br>(0.871) | -1.091<br>(0.922) |
| Time4_4                   | 1.124<br>(0.676)  | 1.426<br>(0.833)  | 0.345<br>(0.723) | 0.902<br>(0.583)  |
| Time5_1                   | 0.488<br>(0.824)  | 1.140<br>(0.973)  | 0.359<br>(1.697) | 1.687<br>(0.762)  |
| Time5_3                   | 0.485<br>(0.684)  | 0.830<br>(0.811)  | 0.749<br>(0.744) | 0.072<br>(0.614)  |
| Risk aversion             | -0.027<br>(0.034) | -0.029<br>(0.034) | 0.029<br>(0.039) | 0.013<br>(0.035)  |
| Internal locus of control | -0.052<br>(0.036) | -0.015<br>(0.033) | 0.003<br>(0.037) | -0.022<br>(0.039) |
| Log likelihood            | -561.615          | -581.744          | -610.013         | -726.640          |
| Pseudo R <sup>2</sup>     | 0.126             | 0.102             | 0.103            | 0.042             |
| Observations              | 426               | 426               | 395              | 384               |

Notes: Ordered logistic regression model of variables of influence on flood risk perception dimensions including time dummy variables. Robust standard errors in parentheses. Significance levels: \*p<0.05; \*\*p<0.01; \*\*\*p<0.001.

**Table S3.** Logit model of variables of influence on change in flood risk perception

|                   | Worry             |                   | Concern             |                   | Probability       |                   | Estimated damage  |                   |
|-------------------|-------------------|-------------------|---------------------|-------------------|-------------------|-------------------|-------------------|-------------------|
|                   | Negative change   | Positive change   | Negative change     | Positive change   | Negative change   | Positive change   | Negative change   | Positive change   |
| Age               | -0.002<br>(0.013) | <0.001<br>(0.012) | 0.005<br>(0.012)    | 0.012<br>(0.012)  | -0.014<br>(0.014) | -0.014<br>(0.014) | 0.009<br>(0.012)  | 0.009<br>(0.013)  |
| Gender            | -0.311<br>(0.404) | -0.066<br>(0.429) | 0.180<br>(0.404)    | 0.668<br>(0.409)  | -0.151<br>(0.416) | -0.350<br>(0.447) | -0.194<br>(0.412) | -0.357<br>(0.467) |
| Education         | -0.106<br>(0.206) | -0.253<br>(0.198) | -0.581**<br>(0.246) | -0.356<br>(0.262) | -0.088<br>(0.209) | 0.112<br>(0.219)  | -0.068<br>(0.199) | -0.012<br>(0.234) |
| Income            | 0.032<br>(0.183)  | -0.208<br>(0.158) | 0.266<br>(0.170)    | 0.260<br>(0.177)  | -0.110<br>(0.183) | -0.195<br>(0.188) | -0.114<br>(0.175) | -0.028<br>(0.187) |
| Homeowner         | 0.798<br>(0.741)  | 0.612<br>(0.721)  | -0.213<br>(0.771)   | -0.296<br>(0.791) | -0.152<br>(0.783) | 0.295<br>(0.896)  | -0.147<br>(0.921) | 0.591<br>(1.530)  |
| Flood experience  | 1.486*<br>(0.636) | 0.373<br>(0.769)  | 1.564*<br>(0.755)   | 0.323<br>(0.715)  | 0.744<br>(0.639)  | 0.546<br>(0.725)  | -0.907<br>(0.595) | -0.415<br>(0.619) |
| Home ground floor | -0.104<br>(0.662) | 1.548<br>(1.156)  | -1.441<br>(1.060)   | -0.146<br>(1.143) | 0.325<br>(0.923)  | 0.765<br>(0.971)  | 0.131<br>(0.878)  | 1.131<br>(1.408)  |
| Basement          | 0.014<br>(0.584)  | -1.595<br>(0.817) | 0.259<br>(0.633)    | -0.130<br>(0.680) | -0.600<br>(0.580) | -0.764<br>(0.723) | 1.113<br>(0.882)  | 1.431<br>(0.768)  |
| FEMA flood zone   | -0.571<br>(0.413) | 0.407<br>(0.490)  | -0.183<br>(0.452)   | -0.185<br>(0.489) | -0.151<br>(0.462) | -0.441<br>(0.503) | -0.059<br>(0.462) | 0.553<br>(0.493)  |
| Constant          | 0.323<br>(1.290)  | -0.480<br>(1.560) | 2.438<br>(1.759)    | -0.146<br>(1.723) | 2.046<br>(1.739)  | 0.741<br>(1.566)  | 0.769<br>(1.498)  | -2.021<br>(1.656) |
| Pseudo R2         | 0.055             | 0.075             | 0.105               | 0.047             | 0.031             | 0.042             | 0.032             | 0.071             |
| Observations      | 133               | 115               | 126                 | 115               | 117               | 94                | 104               | 105               |

Notes: Logit regression estimates of change (negative and positive) versus stability for four indicators of flood risk. Robust standard errors in parentheses. Significance levels: \*p<0.05; \*\*p<0.01; \*\*\*p<0.001

**Table S4.** Logit model of variables of influence of flood risk misperception

|                           | Probability          |                   | Hurricane category |                   | Damage             |                   |
|---------------------------|----------------------|-------------------|--------------------|-------------------|--------------------|-------------------|
|                           | Under-estimate       | Over-estimate     | Under-estimate     | Over-estimate     | Under-estimate     | Over-estimate     |
| Age                       | 0.004<br>(0.011)     | <0.001<br>(0.008) | -0.004<br>(0.009)  | -0.011<br>(0.010) | -0.008<br>(0.012)  | -0.006<br>(0.009) |
| Gender                    | 0.327<br>(0.340)     | 0.250<br>(0.226)  | -0.014<br>(0.261)  | 0.227<br>(0.301)  | -0.621<br>(0.344)  | -0.170<br>(0.263) |
| Education                 | -0.096<br>(0.184)    | -0.232<br>(0.120) | -0.081<br>(0.135)  | -0.033<br>(0.154) | -0.025<br>(0.176)  | -0.052<br>(0.145) |
| Income                    | 0.003<br>(0.150)     | -0.010<br>(0.098) | -0.146<br>(0.113)  | -0.153<br>(0.118) | 0.175<br>(0.131)   | 0.007<br>(0.128)  |
| Homeowner                 | -0.394<br>(0.555)    | 0.116<br>(0.396)  | -0.131<br>(0.446)  | 1.341<br>(0.639)  | 0.974<br>(0.636)   | 0.278<br>(0.491)  |
| Flood experience          | -0.778<br>(0.632)    | 0.143<br>(0.288)  | -0.230<br>(0.378)  | -0.410<br>(0.455) | 0.421<br>(0.496)   | 0.602<br>(0.373)  |
| Social norms              | -0.029<br>(0.077)    | 0.050<br>(0.056)  | -0.030<br>(0.065)  | 0.017<br>(0.073)  | 0.018<br>(0.085)   | -0.037<br>(0.063) |
| Trust government          | -0.089<br>(0.173)    | 0.070<br>(0.119)  | 0.075<br>(0.155)   | -0.300<br>(0.167) | 0.241<br>(0.185)   | 0.206<br>(0.144)  |
| Home ground floor         | 1.257<br>(0.770)     | 1.113*<br>(0.521) | 0.484<br>(0.512)   | -0.374<br>(0.486) | 0.106<br>(0.660)   | 0.267<br>(0.543)  |
| Basement                  | -0.017<br>(0.566)    | -0.333<br>(0.334) | 0.079<br>(0.391)   | 0.075<br>(0.445)  | -0.408<br>(0.508)  | -0.422<br>(0.364) |
| Risk aversion             | 0.087<br>(0.056)     | 0.023<br>(0.039)  | -0.087<br>(0.045)  | -0.088<br>(0.056) | 0.100<br>(0.059)   | 0.104*<br>(0.043) |
| Internal locus of control | 0.034<br>(0.068)     | 0.022<br>(0.041)  | -0.001<br>(0.053)  | 0.029<br>(0.066)  | -0.061<br>(0.066)  | -0.017<br>(0.049) |
| Worry flooding            | -0.167<br>(0.146)    | -0.118<br>(0.096) | -0.004<br>(0.119)  | -0.188<br>(0.141) | 0.097<br>(0.150)   | 0.145<br>(0.112)  |
| Concern flood probability | -0.510***<br>(0.157) | 0.113<br>(0.091)  | 0.151<br>(0.120)   | 0.117<br>(0.134)  | -0.343*<br>(0.153) | -0.095<br>(0.110) |
| Constant                  | -0.950<br>(1.378)    | -1.917<br>(0.977) | -0.544<br>(1.092)  | -0.240<br>(1.351) | -0.915<br>(1.672)  | 0.306<br>(1.055)  |
| Pseudo R2                 | 0.139                | 0.032             | 0.027              | 0.048             | 0.094              | 0.041             |
| Observations              | 315                  | 387               | 377                | 359               | 175                | 304               |

Notes: Logit regression estimates of misperception (over- and under-) versus correct estimation for three indicators of flood risk. Robust standard errors in parentheses. Significance levels: \*p<0.05; \*\*p<0.01; \*\*\*p<0.001
